# Supplementary material
Source: ML conference proceedings conference paper supplement (https://openaccess.thecvf.com/content/ICCV2023/html/Wang_Informative_Data_Mining_ICCV_2023_paper.html)
Supplement: Supplementary file 1 [file Wang_Informative_Data_Mining_ICCV_2023_supplemental.pdf]

# Informative Data Mining for One-shot Cross-Domain Semantic Segmentation

Yuxi Wang<sup>1,2</sup> Jian Liang<sup>2,3,4</sup> Jun Xiao<sup>3</sup> Shuqi Mei<sup>5</sup> Yuran Yang<sup>5</sup> Zhaoxiang Zhang<sup>1,2,3,4,\*</sup>

<sup>1</sup>Centre for Artificial Intelligence and Robotics, HKISI-CAS

<sup>2</sup>Institute of Automation, Chinese Academy of Sciences <sup>3</sup>University of Chinese Academy of Sciences

<sup>4</sup>State Key Laboratory of Multimodal Artificial Intelligence Systems <sup>5</sup>Tencent

{yuxiwang93, liangjian92}@gmail.com zhaoxiang.zhang@ia.ac.cn

## A. Appendix

### A.1. Detailed Comparison Results

This section provides detailed comparison results between the proposed **IDM** and existing conventional domain adaptive semantic segmentation methods and one-shot cross-domain semantic segmentation methods. For a fair comparison, we perform experiments on different backbones with DeepLab-v2 and transformer architecture, respectively. To be specific, Table S1 provides the results of GTA5→Cityscapes on DeepLab-v2 based on ResNet-101 backbone, Table S2 shows the results of SYNTHIA→Cityscapes on DeepLab-v2 based on ResNet-101 backbone, and Table S3 is the results of GTA5/SYNTHIA→Cityscapes based on transformer-architecture. Note that we use SegFormer [23] as the backbone following DAFormer [4]. We compare the conventional unsupervised domain adaptation (UDA) using the whole target data and one-shot domain adaptation (One-shot UDA) that only one target image is available during adaptation.

Note that, for adaptation of GTA5→Cityscapes, our method arrives the performance 57.3% mIoU and 45.2% on conditional domain adaptation (UDA) and one-shot domain adaptation (OSDA) based on DeepLab-v2, and 69.5% and 56.7% based on transformer-architecture. Besides, the performance of SYNTHIA→Cityscapes is 65.9% and 47.2% on conditional domain adaptation (UDA) and one-shot domain adaptation (OSDA) based on DeepLab-v2, and 67.9% and 55.4% based on transformer-architecture.

### A.2. Results on different weather.

We also conduct experiments on adaptation scenarios from GTA5 to CS Foggy and ACDC [12] (including *foggy*, *snow*, *night*, and *rainy*). The detailed results are shown in the following.

\*Zhaoxiang Zhang is the corresponding author.

## References

- [1] Nikita Arslanov and Stefan Roth. Self-supervised augmentation consistency for adapting semantic segmentation. In *Proc. CVPR*, pages 15384–15394, 2021. 2, 3
- [2] Runfa Chen, Yu Rong, Shangmin Guo, Jiaqi Han, Fuchun Sun, Tingyang Xu, and Wenbing Huang. Smoothing matters: Momentum transformer for domain adaptive semantic segmentation. *arXiv preprint arXiv:2203.07988*, 2022. 4
- [3] Judy Hoffman, Eric Tzeng, Taesung Park, Jun-Yan Zhu, Phillip Isola, Kate Saenko, Alexei Efros, and Trevor Darrell. CyCADA: Cycle-consistent adversarial domain adaptation. In *Proc. ICML*, pages 1989–1998, 2018. 2
- [4] Lukas Hoyer, Dengxin Dai, and Luc Van Gool. Daformer: Improving network architectures and training strategies for domain-adaptive semantic segmentation. In *Proc. CVPR*, pages 9924–9935, 2022. 1, 4
- [5] Ruihuang Li, Shuai Li, Chenhang He, Yabin Zhang, Xu Jia, and Lei Zhang. Class-balanced pixel-level self-labeling for domain adaptive semantic segmentation. In *Proc. CVPR*, pages 11593–11603, 2022. 2, 3
- [6] Yunsheng Li, Lu Yuan, and Nuno Vasconcelos. Bidirectional learning for domain adaptation of semantic segmentation. In *Proc. CVPR*, pages 6936–6945, 2019. 2, 3
- [7] Yawei Luo, Ping Liu, Tao Guan, Junqing Yu, and Yi Yang. Adversarial style mining for one-shot unsupervised domain adaptation. *Advances in Neural Information Processing Systems*, 33:20612–20623, 2020. 2, 3
- [8] Yawei Luo, Liang Zheng, Tao Guan, Junqing Yu, and Yi Yang. Taking a closer look at domain shift: Category-level adversaries for semantics consistent domain adaptation. In *Proc. CVPR*, pages 2507–2516, 2019. 2, 3
- [9] Fengmao Lv, Tao Liang, Xiang Chen, and Guosheng Lin. Cross-domain semantic segmentation via domain-invariant interactive relation transfer. In *Proc. CVPR*, pages 4334–4343, 2020. 2, 3
- [10] Haoyu Ma, Xiangru Lin, Zifeng Wu, and Yizhou Yu. Coarse-to-fine domain adaptive semantic segmentation with photometric alignment and category-center regularization. In *Proc. CVPR*, pages 4051–4060, 2021. 2, 3
- [11] Ke Mei, Chuang Zhu, Jiaqi Zou, and Shanghang Zhang. Instance adaptive self-training for unsupervised domain adaptation. In *Proc. ECCV*, pages 415–430, 2020. 2, 3

Table S1. Adaptation from GTA5 to Cityscapes on Deeplab-v2 based on ResNet-101 backbone. # TS denotes the number of target samples used in training.

| Method              | #TS | road | side. | build. | wall | fence | pole | light | sign | vege. | terr. | sky  | person | rider | car  | truck | bus  | train | motor. | bike | mIoU |
|---------------------|-----|------|-------|--------|------|-------|------|-------|------|-------|-------|------|--------|-------|------|-------|------|-------|--------|------|------|
| <b>UDA</b>          |     |      |       |        |      |       |      |       |      |       |       |      |        |       |      |       |      |       |        |      |      |
| Source Only         | -   | 75.8 | 16.8  | 77.2   | 12.5 | 21.0  | 25.5 | 30.1  | 20.1 | 81.3  | 24.6  | 70.3 | 53.8   | 26.4  | 49.9 | 17.2  | 25.9 | 6.5   | 25.3   | 36.0 | 36.5 |
| AdaptSeg [14]       | All | 86.5 | 36.0  | 79.9   | 23.4 | 23.3  | 23.9 | 35.2  | 14.8 | 83.4  | 33.3  | 75.6 | 58.5   | 27.6  | 73.7 | 32.5  | 35.4 | 3.9   | 30.1   | 28.1 | 42.4 |
| CyCADA [3]          | All | 86.7 | 35.6  | 80.1   | 19.8 | 17.5  | 38.0 | 39.9  | 41.5 | 82.7  | 27.9  | 73.6 | 64.9   | 19.0  | 65.0 | 12.0  | 28.6 | 4.5   | 31.1   | 42.0 | 42.7 |
| CLAN [8]            | All | 87.0 | 27.1  | 79.6   | 27.3 | 23.3  | 28.3 | 35.5  | 24.2 | 83.6  | 27.4  | 74.2 | 58.6   | 28.0  | 76.2 | 33.1  | 36.7 | 6.7   | 31.9   | 31.4 | 43.2 |
| ADVENT [16]         | All | 89.4 | 33.1  | 81.0   | 26.6 | 26.8  | 27.2 | 33.5  | 24.7 | 83.9  | 36.7  | 78.8 | 58.7   | 30.5  | 84.8 | 38.5  | 44.5 | 1.7   | 31.6   | 32.4 | 45.5 |
| APODA [24]          | All | 85.6 | 32.8  | 79.0   | 29.5 | 25.5  | 26.8 | 34.6  | 19.9 | 83.7  | 40.6  | 77.9 | 59.2   | 28.3  | 84.6 | 34.6  | 49.2 | 8.0   | 32.6   | 39.6 | 45.9 |
| CBST [30]           | All | 91.8 | 53.5  | 80.5   | 32.7 | 21.0  | 34.0 | 28.9  | 20.4 | 83.9  | 34.2  | 80.9 | 53.1   | 24.0  | 82.7 | 30.3  | 35.9 | 16.0  | 25.9   | 42.8 | 45.9 |
| PatchAlign [15]     | All | 92.3 | 51.9  | 82.1   | 29.2 | 25.1  | 24.5 | 33.8  | 33.0 | 82.4  | 32.8  | 82.2 | 58.6   | 27.2  | 84.3 | 33.4  | 46.3 | 2.2   | 29.5   | 32.3 | 46.5 |
| MRKLD [29]          | All | 91.0 | 55.4  | 80.0   | 33.7 | 21.4  | 37.3 | 32.9  | 24.5 | 85.0  | 34.1  | 80.8 | 57.7   | 24.6  | 84.1 | 27.8  | 30.1 | 26.9  | 26.0   | 42.3 | 47.1 |
| BDL [6]             | All | 91.0 | 44.7  | 84.2   | 34.6 | 27.6  | 30.2 | 36.0  | 36.0 | 85.0  | 43.6  | 83.0 | 58.6   | 31.6  | 83.3 | 35.3  | 49.7 | 3.3   | 28.8   | 35.6 | 48.5 |
| FADA [18]           | All | 91.0 | 50.6  | 86.0   | 43.4 | 29.8  | 36.8 | 43.4  | 25.0 | 86.8  | 38.3  | 87.4 | 64.0   | 38.0  | 85.2 | 31.6  | 46.1 | 6.5   | 25.4   | 37.1 | 50.1 |
| CAG [27]            | All | 90.4 | 51.6  | 83.8   | 34.2 | 27.8  | 38.4 | 25.3  | 48.4 | 85.4  | 38.2  | 78.1 | 58.6   | 34.6  | 84.7 | 21.9  | 42.7 | 41.1  | 29.3   | 37.2 | 50.2 |
| Seg-Uncert. [28]    | All | 90.4 | 31.2  | 85.1   | 36.9 | 25.6  | 37.5 | 48.8  | 48.5 | 85.3  | 34.8  | 81.1 | 64.4   | 36.8  | 86.3 | 34.9  | 52.2 | 1.7   | 29.0   | 44.6 | 50.3 |
| FDA [25]            | All | 92.5 | 53.3  | 82.4   | 26.5 | 27.6  | 36.4 | 40.6  | 38.9 | 82.3  | 39.8  | 78.0 | 62.6   | 34.4  | 84.9 | 34.1  | 53.1 | 16.9  | 27.7   | 46.4 | 50.5 |
| PIT [9]             | All | 87.5 | 43.4  | 78.8   | 31.2 | 30.2  | 36.3 | 39.9  | 42.0 | 79.2  | 37.1  | 79.3 | 65.4   | 37.5  | 83.2 | 46.0  | 45.6 | 25.7  | 23.5   | 49.9 | 50.6 |
| IAST [11]           | All | 93.8 | 57.8  | 85.1   | 39.5 | 26.7  | 26.2 | 43.1  | 34.7 | 84.9  | 32.9  | 88.0 | 62.6   | 29.0  | 87.3 | 39.2  | 49.6 | 23.2  | 34.7   | 39.6 | 51.5 |
| DACS [13]           | All | 89.9 | 39.7  | 87.9   | 30.7 | 39.5  | 38.5 | 46.4  | 52.8 | 88.0  | 44.0  | 88.8 | 67.2   | 35.8  | 84.5 | 45.7  | 50.2 | 0.0   | 27.3   | 34.0 | 52.1 |
| UPLR [20]           | All | 90.5 | 38.7  | 86.5   | 41.1 | 32.9  | 40.5 | 48.2  | 42.1 | 86.5  | 36.8  | 84.2 | 64.5   | 38.1  | 87.2 | 34.8  | 50.4 | 0.2   | 41.8   | 54.6 | 52.6 |
| SAC [1]             | All | 90.4 | 53.9  | 86.6   | 42.4 | 27.3  | 45.1 | 48.5  | 42.7 | 87.4  | 40.1  | 86.1 | 67.5   | 29.7  | 88.5 | 49.1  | 54.6 | 9.8   | 26.6   | 45.3 | 53.8 |
| CTF [10]            | All | 92.5 | 58.3  | 86.5   | 27.4 | 28.8  | 38.1 | 46.7  | 42.5 | 85.4  | 38.4  | 91.8 | 66.4   | 37.0  | 87.8 | 40.7  | 52.4 | 44.6  | 41.7   | 59.0 | 56.1 |
| CorDA [19]          | All | 94.7 | 63.1  | 87.6   | 30.7 | 40.6  | 40.2 | 47.8  | 51.6 | 87.6  | 47.0  | 89.7 | 66.7   | 35.9  | 90.2 | 48.9  | 57.5 | 0.0   | 39.8   | 56.0 | 56.6 |
| ProDA [26]          | All | 87.8 | 56.0  | 79.7   | 46.3 | 44.8  | 45.6 | 53.5  | 53.5 | 88.6  | 45.2  | 82.1 | 70.7   | 39.2  | 88.8 | 45.5  | 59.4 | 1.0   | 48.9   | 56.4 | 57.5 |
| CPSL [5]            | All | 92.3 | 59.9  | 84.9   | 45.7 | 29.7  | 52.8 | 61.5  | 59.5 | 87.9  | 41.5  | 85.0 | 73.0   | 35.5  | 90.4 | 48.7  | 73.9 | 26.3  | 53.8   | 53.9 | 60.8 |
| <b>IDM (Ours)</b>   | All | 94.3 | 67.5  | 87.0   | 39.8 | 37.0  | 42.9 | 54.8  | 62.0 | 87.3  | 44.5  | 87.6 | 71.6   | 47.1  | 88.7 | 51.0  | 53.1 | 5.4   | 22.0   | 44.4 | 57.3 |
| <b>One-shot UDA</b> |     |      |       |        |      |       |      |       |      |       |       |      |        |       |      |       |      |       |        |      |      |
| AdaptSeg [14]       | One | 77.7 | 19.2  | 75.5   | 11.7 | 6.4   | 16.8 | 18.2  | 15.4 | 77.1  | 34.0  | 68.5 | 55.3   | 30.9  | 74.5 | 23.7  | 28.3 | 2.9   | 14.4   | 18.9 | 35.2 |
| ADVENT [16]         | One | 76.1 | 15.1  | 76.6   | 14.4 | 10.8  | 17.5 | 19.8  | 12.0 | 79.2  | 39.5  | 71.3 | 55.7   | 25.2  | 76.7 | 28.3  | 30.5 | 0.0   | 23.6   | 14.4 | 36.1 |
| CLAN [8]            | One | 77.1 | 22.7  | 78.6   | 17.0 | 14.8  | 20.5 | 23.8  | 12.0 | 80.2  | 39.5  | 74.3 | 56.6   | 25.2  | 78.1 | 29.3  | 31.2 | 0.0   | 19.4   | 16.7 | 37.7 |
| CBST [30]           | One | 76.1 | 22.2  | 73.5   | 13.8 | 18.8  | 19.1 | 20.7  | 18.6 | 79.5  | 41.3  | 74.8 | 57.4   | 19.9  | 78.7 | 21.3  | 28.5 | 0.0   | 28.0   | 13.2 | 37.1 |
| ProDA [26]          | One | 80.9 | 32.2  | 68.9   | 24.7 | 21.0  | 24.6 | 29.6  | 14.8 | 71.7  | 28.6  | 66.4 | 55.8   | 17.5  | 81.6 | 21.2  | 24.2 | 20.0  | 25.0   | 13.9 | 38.0 |
| SM-PPM [22]         | One | 85.0 | 23.2  | 80.4   | 21.3 | 24.5  | 30.0 | 32.0  | 26.7 | 83.2  | 34.8  | 74.0 | 57.3   | 29.0  | 77.7 | 27.3  | 36.5 | 5.0   | 28.2   | 39.4 | 42.8 |
| ASM[7]              | One | 89.5 | 31.2  | 81.3   | 27.8 | 22.8  | 30.6 | 32.8  | 25.1 | 82.6  | 35.0  | 76.7 | 59.2   | 26.6  | 82.3 | 27.7  | 34.1 | 0.9   | 25.6   | 29.6 | 43.2 |
| <b>IDM (Ours)</b>   | One | 89.7 | 43.5  | 83.3   | 27.1 | 24.2  | 33.4 | 37.2  | 24.2 | 80.2  | 19.6  | 83.9 | 67.1   | 36.4  | 86.2 | 34.2  | 41.6 | 2.7   | 26.9   | 17.9 | 45.2 |

- [12] Christos Sakaridis, Dengxin Dai, and Luc Van Gool. Acde: The adverse conditions dataset with correspondences for semantic driving scene understanding. In *Proc. ICCV*, pages 10765–10775, 2021. 1
- [13] Wilhelm Tranheden, Viktor Olsson, Juliano Pinto, and Lennart Svensson. Dacs: Domain adaptation via cross-domain mixed sampling. In *Proc. WACV*, pages 1379–1389, 2021. 2, 3
- [14] Yi-Hsuan Tsai, Wei-Chih Hung, Samuel Schulter, Kihyuk Sohn, Ming-Hsuan Yang, and Manmohan Chandraker. Learning to adapt structured output space for semantic segmentation. In *Proc. CVPR*, pages 7472–7481, 2018. 2, 3
- [15] Yi-Hsuan Tsai, Kihyuk Sohn, Samuel Schulter, and Manmohan Chandraker. Domain adaptation for structured output via discriminative patch representations. In *Proc. ICCV*, pages 1456–1465, 2019. 2, 3
- [16] Tuan-Hung Vu, Himalaya Jain, Maxime Bucher, Matthieu Cord, and Patrick Pérez. Advent: Adversarial entropy minimization for domain adaptation in semantic segmentation. In *Proc. CVPR*, pages 2517–2526, 2019. 2, 3
- [17] Tuan-Hung Vu, Himalaya Jain, Maxime Bucher, Matthieu Cord, and Patrick Pérez. Dada: Depth-aware domain adaptation in semantic segmentation. In *Proc. ICCV*, pages 7364–7373, 2019. 3
- [18] Haoran Wang, Tong Shen, Wei Zhang, Ling-Yu Duan, and Tao Mei. Classes matter: A fine-grained adversarial approach to cross-domain semantic segmentation. In *Proc. ECCV*, pages 642–659. Springer, 2020. 2, 3

Table S2. Adaptation from SYNTHIA to Cityscapes on DeepLab-v2 based on ResNet-101 backbone. # TS denotes the number of target samples used in training.

| Method                   | #TS | road | side. | build. | wall* | fence* | pole* | light | sign | vege. | sky  | person | rider | car  | bus  | motor. | bike | mIoU* | mIoU |
|--------------------------|-----|------|-------|--------|-------|--------|-------|-------|------|-------|------|--------|-------|------|------|--------|------|-------|------|
| <b>UDA</b>               |     |      |       |        |       |        |       |       |      |       |      |        |       |      |      |        |      |       |      |
| Source Only              | -   | 55.6 | 23.8  | 74.6   | -     | -      | -     | 6.1   | 12.1 | 74.8  | 79.0 | 55.3   | 19.1  | 39.6 | 23.3 | 13.7   | 25.0 | -     | 38.6 |
| AdaptSeg [14]            | All | 79.2 | 37.2  | 78.8   | -     | -      | -     | 9.9   | 10.5 | 78.2  | 80.5 | 53.5   | 19.6  | 67.0 | 29.5 | 21.6   | 31.3 | -     | 45.9 |
| PatchAlign [15]          | All | 82.4 | 38.0  | 78.6   | 8.7   | 0.6    | 26.0  | 3.9   | 11.1 | 75.5  | 84.6 | 53.5   | 21.6  | 71.4 | 32.6 | 19.3   | 31.7 | 40.0  | 46.5 |
| CLAN [8]                 | All | 81.3 | 37.0  | 80.1   | -     | -      | -     | 16.1  | 13.7 | 78.2  | 81.5 | 53.4   | 21.2  | 73.0 | 32.9 | 22.6   | 30.7 | -     | 47.8 |
| ADVENT [16]              | All | 85.6 | 42.2  | 79.7   | 8.7   | 0.4    | 25.9  | 5.4   | 8.1  | 80.4  | 84.1 | 57.9   | 23.8  | 73.3 | 36.4 | 14.2   | 33.0 | 41.2  | 48.0 |
| CBST [30]                | All | 68.0 | 29.9  | 76.3   | 10.8  | 1.4    | 33.9  | 22.8  | 29.5 | 77.6  | 78.3 | 60.6   | 28.3  | 81.6 | 23.5 | 18.8   | 39.8 | 42.6  | 48.9 |
| DADA [17]                | All | 89.2 | 44.8  | 81.4   | 6.8   | 0.3    | 26.2  | 8.6   | 11.1 | 81.8  | 84.0 | 54.7   | 19.3  | 79.7 | 40.7 | 14.0   | 38.8 | 42.6  | 49.8 |
| MRKLD [29]               | All | 67.7 | 32.2  | 73.9   | 10.7  | 1.6    | 37.4  | 22.2  | 31.2 | 80.8  | 80.5 | 60.8   | 29.1  | 82.8 | 25.0 | 19.4   | 45.3 | 43.8  | 50.1 |
| BDL [6]                  | All | 86.0 | 46.7  | 80.3   | -     | -      | -     | 14.1  | 11.6 | 79.2  | 81.3 | 54.1   | 27.9  | 73.7 | 42.2 | 25.7   | 45.3 | -     | 51.4 |
| CAG [27]                 | All | 84.7 | 40.8  | 81.7   | 7.8   | 0.0    | 35.1  | 13.3  | 22.7 | 84.5  | 77.6 | 64.2   | 27.8  | 80.9 | 19.7 | 22.7   | 48.3 | 44.5  | 51.5 |
| PIT [9]                  | All | 83.1 | 27.6  | 81.5   | 8.9   | 0.3    | 21.8  | 26.4  | 33.8 | 76.4  | 78.8 | 64.2   | 27.6  | 79.6 | 31.2 | 31.0   | 31.3 | 44.0  | 51.8 |
| SIM [21]                 | All | 83.0 | 44.0  | 80.3   | -     | -      | -     | 17.1  | 15.8 | 80.5  | 81.8 | 59.9   | 33.1  | 70.2 | 37.3 | 28.5   | 45.8 | -     | 52.1 |
| FDA [25]                 | All | 79.3 | 35.0  | 73.2   | -     | -      | -     | 19.9  | 24.0 | 61.7  | 82.6 | 61.4   | 31.1  | 83.9 | 40.8 | 38.4   | 51.1 | -     | 52.5 |
| FADA [18]                | All | 84.5 | 40.1  | 83.1   | 4.8   | 0.0    | 34.3  | 20.1  | 27.2 | 84.8  | 84.0 | 53.5   | 22.6  | 85.4 | 43.7 | 26.8   | 27.8 | 45.2  | 52.5 |
| APODA [24]               | All | 86.4 | 41.3  | 79.3   | -     | -      | -     | 22.6  | 17.3 | 80.3  | 81.6 | 56.9   | 21.0  | 84.1 | 49.1 | 24.6   | 45.7 | -     | 53.1 |
| UPLR [20]                | All | 79.4 | 34.6  | 83.5   | 19.3  | 2.8    | 35.3  | 32.1  | 26.9 | 78.8  | 79.6 | 66.6   | 30.3  | 86.1 | 36.6 | 19.5   | 56.9 | 48.0  | 54.6 |
| DACS [13]                | All | 80.6 | 25.1  | 81.9   | 21.5  | 2.9    | 37.2  | 22.7  | 24.0 | 83.7  | 90.8 | 67.6   | 38.3  | 82.9 | 38.9 | 28.5   | 47.6 | 48.3  | 54.8 |
| Seg-Uncert. [28]         | All | 87.6 | 41.9  | 83.1   | 14.7  | 1.7    | 36.2  | 31.3  | 19.9 | 81.6  | 80.6 | 63.0   | 21.8  | 86.2 | 40.7 | 23.6   | 53.1 | 47.9  | 54.9 |
| CTF [10]                 | All | 75.7 | 30.0  | 81.9   | 11.5  | 2.5    | 35.3  | 18.0  | 32.7 | 86.2  | 90.1 | 65.1   | 33.2  | 83.3 | 36.5 | 35.3   | 54.3 | 48.2  | 55.5 |
| IAST [11]                | All | 81.9 | 41.5  | 83.3   | 17.7  | 4.6    | 32.3  | 30.9  | 28.8 | 83.4  | 85.0 | 65.5   | 30.8  | 86.5 | 38.2 | 33.1   | 52.7 | 49.8  | 57.0 |
| CPSL [5]                 | All | 87.2 | 43.9  | 85.5   | 33.6  | 0.3    | 47.7  | 57.4  | 37.2 | 87.8  | 88.5 | 79.0   | 32.0  | 90.6 | 49.4 | 50.8   | 59.8 | 65.3  | 57.9 |
| SAC [1]                  | All | 89.3 | 47.2  | 85.5   | 26.5  | 1.3    | 43.0  | 45.5  | 32.0 | 87.1  | 89.3 | 63.6   | 25.4  | 86.9 | 35.6 | 30.4   | 53.0 | 52.6  | 59.3 |
| ProDA [26]               | All | 87.8 | 45.7  | 84.6   | 37.1  | 0.6    | 44.0  | 54.6  | 37.0 | 88.1  | 84.4 | 74.2   | 24.3  | 88.2 | 51.1 | 40.5   | 45.6 | 55.5  | 62.0 |
| CorDA [19]               | All | 93.3 | 61.6  | 85.3   | 19.6  | 5.1    | 37.8  | 36.6  | 42.8 | 84.9  | 90.4 | 69.7   | 41.8  | 85.6 | 38.4 | 32.6   | 53.9 | 55.0  | 62.8 |
| <b>IDM (Ours)</b>        | All | 84.2 | 40.4  | 87.3   | 39.9  | 4.2    | 37.8  | 55.2  | 54.0 | 78.6  | 80.2 | 75.3   | 48.7  | 88.2 | 52.0 | 48.1   | 66.2 | 58.6  | 65.9 |
| <b>One-shot UDA</b>      |     |      |       |        |       |        |       |       |      |       |      |        |       |      |      |        |      |       |      |
| AdaptSeg [14]            | One | 64.1 | 25.6  | 75.3   | -     | -      | -     | 4.7   | 2.7  | 77.0  | 70.0 | 52.2   | 20.6  | 51.3 | 22.4 | 19.9   | 22.3 | -     | 39.1 |
| CLAN [8]                 | One | 68.3 | 26.9  | 72.2   | -     | -      | -     | 5.1   | 5.3  | 75.9  | 71.4 | 54.8   | 18.4  | 65.3 | 19.2 | 22.1   | 20.7 | -     | 40.4 |
| ADVENT [16]              | One | 65.7 | 22.3  | 69.2   | -     | -      | -     | 2.9   | 3.3  | 76.9  | 69.2 | 55.4   | 21.4  | 77.3 | 17.4 | 21.4   | 16.7 | -     | 39.9 |
| CBST [30]                | One | 59.6 | 24.1  | 72.9   | -     | -      | -     | 5.5   | 13.8 | 72.2  | 69.8 | 55.3   | 21.1  | 57.1 | 17.4 | 13.8   | 18.5 | -     | 38.5 |
| ProDA [26]               | One | 81.8 | 38.9  | 60.6   | 7.8   | 0      | 31.6  | 14.6  | 11.5 | 51.5  | 69.9 | 56.2   | 16.4  | 79.2 | 24.4 | 5.9    | 32.3 | 36.4  | 41.8 |
| ASM [7]                  | One | 85.7 | 39.7  | 77.1   | 1.1   | 0.0    | 24.2  | 2.1   | 9.2  | 76.9  | 81.7 | 43.4   | 11.4  | 63.9 | 15.8 | 1.6    | 20.3 | 34.6  | 40.7 |
| SM-PPM [22]              | One | 79.3 | 35.3  | 75.9   | 5.6   | 16.6   | 29.8  | 25.4  | 22.7 | 79.9  | 76.8 | 54.6   | 23.5  | 60.2 | 23.9 | 21.2   | 36.6 | 41.4  | 47.3 |
| SM-PPM <sup>†</sup> [22] | One | 66.2 | 27.2  | 72.7   | 6.4   | 0.2    | 27.3  | 14.5  | 15.5 | 73.6  | 80.8 | 54.1   | 18.8  | 59.1 | 15.5 | 15.8   | 28.1 | 35.9  | 41.7 |
| <b>IDM (Ours)</b>        | One | 84.9 | 36.8  | 78.5   | 4.5   | 5.3    | 33.1  | 14.6  | 18.0 | 80.4  | 81.8 | 56.6   | 23.4  | 73.9 | 25.7 | 13.4   | 25.4 | 41.0  | 47.2 |

[19] Qin Wang, Dengxin Dai, Lukas Hoyer, Luc Van Gool, and Olga Fink. Domain adaptive semantic segmentation with self-supervised depth estimation. In *Proc. ICCV*, pages 8515–8525, 2021. 2, 3

[20] Yuxi Wang, Junran Peng, and ZhaoXiang Zhang. Uncertainty-aware pseudo label refinery for domain adaptive semantic segmentation. In *Proc. ICCV*, pages 9092–9101, 2021. 2, 3

[21] Zhonghao Wang, Mo Yu, Yunchao Wei, Rogerio Feris, Jin-

jun Xiong, Wen-mei Hwu, Thomas S Huang, and Honghui Shi. Differential treatment for stuff and things: A simple unsupervised domain adaptation method for semantic segmentation. In *Proc. CVPR*, pages 12635–12644, 2020. 3

[22] Xinyi Wu, Zhenyao Wu, Yuhang Lu, Lili Ju, and Song Wang. Style mixing and patchwise prototypical matching for one-shot unsupervised domain adaptive semantic segmentation. *arXiv preprint arXiv:2112.04665*, 2021. 2, 3

[23] Enze Xie, Wenhao Wang, Zhiding Yu, Anima Anandkumar,

Table S3. Comparison results using SegF. MiT-B5. # TS denotes the number of target samples used in training.

| GTA5 → Cityscapes |     |      |       |        |      |       |      |       |      |       |       |      |        |       |      |       |      |       |        |      |      |
|-------------------|-----|------|-------|--------|------|-------|------|-------|------|-------|-------|------|--------|-------|------|-------|------|-------|--------|------|------|
| Method            | #TS | road | side. | build. | wall | fence | pole | light | sign | vege. | terr. | sky  | person | rider | car  | truck | bus  | train | motor. | bike | mIoU |
| Source Only       | -   | 77.1 | 15.2  | 83.8   | 30.8 | 32.0  | 27.9 | 41.5  | 18.5 | 86.5  | 42.5  | 86.8 | 62.6   | 22.2  | 87.0 | 42.7  | 36.8 | 6.1   | 33.5   | 12.5 | 44.5 |
| TransDA-B [2]     | All | 94.7 | 64.2  | 89.2   | 48.1 | 45.8  | 50.1 | 60.2  | 40.8 | 90.4  | 50.2  | 93.7 | 76.7   | 47.6  | 92.5 | 56.8  | 60.1 | 47.6  | 49.6   | 55.4 | 63.9 |
| DAFormer [4]      | All | 95.7 | 70.2  | 89.4   | 53.5 | 48.1  | 49.6 | 55.8  | 59.4 | 89.9  | 47.9  | 92.5 | 72.2   | 44.7  | 92.3 | 74.5  | 78.2 | 65.1  | 55.9   | 61.8 | 68.3 |
| <b>IDM (Ours)</b> | All | 97.2 | 77.1  | 89.8   | 51.7 | 51.7  | 54.5 | 59.7  | 64.7 | 89.2  | 45.3  | 90.5 | 74.2   | 46.6  | 92.3 | 76.9  | 59.6 | 81.2  | 57.3   | 62.4 | 69.5 |
| DAFormer [4]      | One | 88.7 | 34.4  | 84.9   | 29.1 | 28.5  | 36.9 | 43.9  | 29.7 | 83.4  | 29.6  | 84.1 | 66.0   | 38.0  | 86.8 | 54.9  | 47.3 | 32.8  | 24.6   | 37.8 | 50.6 |
| <b>IDM (Ours)</b> | One | 88.5 | 30.0  | 86.7   | 35.0 | 33.6  | 45.0 | 49.9  | 50.7 | 86.9  | 32.8  | 86.1 | 68.1   | 40.0  | 89.1 | 66.4  | 50.6 | 45.6  | 39.3   | 52.1 | 56.7 |

  

| SYNTIA → Cityscapes |     |      |       |        |       |        |      |       |       |       |      |        |       |      |      |        |      |       |      |  |  |
|---------------------|-----|------|-------|--------|-------|--------|------|-------|-------|-------|------|--------|-------|------|------|--------|------|-------|------|--|--|
| Method              | #TS | road | side. | build. | wall* | fence* | pole | light | sign* | vege. | sky  | person | rider | car  | bus  | motor. | bike | mIoU* | mIoU |  |  |
| Source Only         | -   | 69.9 | 27.8  | 82.9   | 21.6  | 2.3    | 39.2 | 36.3  | 29.9  | 84.2  | 84.9 | 61.6   | 22.6  | 83.8 | 48.0 | 14.9   | 19.7 | 45.6  | 51.3 |  |  |
| TransDA-B [2]       | All | 90.4 | 54.8  | 86.4   | 31.1  | 1.7    | 53.8 | 61.1  | 37.1  | 90.3  | 93.0 | 71.2   | 25.3  | 92.3 | 66.0 | 44.4   | 49.8 | 59.3  | 66.3 |  |  |
| DAFormer [4]        | All | 84.5 | 40.7  | 88.4   | 41.5  | 6.5    | 50.0 | 55.0  | 54.6  | 86.0  | 89.8 | 73.2   | 48.2  | 87.2 | 53.2 | 53.9   | 61.7 | 60.9  | 67.4 |  |  |
| <b>IDM (Ours)</b>   | All | 87.6 | 47.6  | 88.1   | 33.4  | 6.3    | 52.8 | 57.8  | 56.5  | 83.0  | 77.5 | 66.2   | 52.1  | 89.3 | 55.6 | 57.1   | 64.2 | 60.9  | 67.9 |  |  |
| DAFormer [4]        | One | 65.3 | 26.1  | 79.5   | 24.8  | 1.9    | 38.3 | 30.7  | 23.8  | 81.4  | 84.0 | 66.1   | 27.6  | 70.8 | 39.3 | 23.7   | 33.8 | 44.8  | 50.2 |  |  |
| <b>IDM (Ours)</b>   | One | 85.4 | 39.4  | 83.5   | 11.6  | 0.6    | 43.9 | 45.4  | 31.7  | 86.0  | 83.9 | 62.3   | 23.3  | 87.4 | 32.4 | 25.1   | 34.1 | 48.5  | 55.4 |  |  |

| Model             | CS Fog | Snow | Rainy | Night | Foggy | Mean |
|-------------------|--------|------|-------|-------|-------|------|
| Src Only          | 44.5   | 40.6 | 39.7  | 22.5  | 43.6  | 38.2 |
| <b>IDM (Ours)</b> | 54.9   | 47.3 | 45.6  | 30.2  | 51.4  | 45.9 |

[30] Yang Zou, Zhiding Yu, BVK Vijaya Kumar, and Jinsong Wang. Unsupervised domain adaptation for semantic segmentation via class-balanced self-training. In *Proc. ECCV*, pages 289–305, 2018. 2, 3

Jose M Alvarez, and Ping Luo. Segformer: Simple and efficient design for semantic segmentation with transformers. *Proc. NeurIPS*, 34:12077–12090, 2021. 1

- [24] Jihan Yang, Ruijia Xu, Ruiyu Li, Xiaojuan Qi, Xiaoyong Shen, Guanbin Li, and Liang Lin. An adversarial perturbation oriented domain adaptation approach for semantic segmentation. In *Proc. AAAI*, volume 34, pages 12613–12620, 2020. 2, 3
- [25] Yanchao Yang and Stefano Soatto. Fda: Fourier domain adaptation for semantic segmentation. In *Proc. CVPR*, pages 4085–4095, 2020. 2, 3
- [26] Pan Zhang, Bo Zhang, Ting Zhang, Dong Chen, Yong Wang, and Fang Wen. Prototypical pseudo label denoising and target structure learning for domain adaptive semantic segmentation. In *Proc. CVPR*, pages 12414–12424, 2021. 2, 3
- [27] Qiming Zhang, Jing Zhang, Wei Liu, and Dacheng Tao. Category anchor-guided unsupervised domain adaptation for semantic segmentation. In *Proc. NeurIPS*, pages 433–443, 2019. 2, 3
- [28] Zhedong Zheng and Yi Yang. Rectifying pseudo label learning via uncertainty estimation for domain adaptive semantic segmentation. *International Journal of Computer Vision*, 129(4):1106–1120, 2021. 2, 3
- [29] Yang Zou, Zhiding Yu, Xiaofeng Liu, BVK Kumar, and Jinsong Wang. Confidence regularized self-training. In *Proc. ICCV*, pages 5982–5991, 2019. 2, 3
